# Supplementary material
Source: HighWire-hosted journal article supplement (http://thorax.bmjjournals.com/highwire/filestream/173686/field_highwire_adjunct_files/0/608623fig.pdf)

**Supplemental Figure S1. Sequence analysis of the novel 536C>T polymorphism.  
i) CC homozygote, ii) CT heterozygote, iii) TT homozygote**

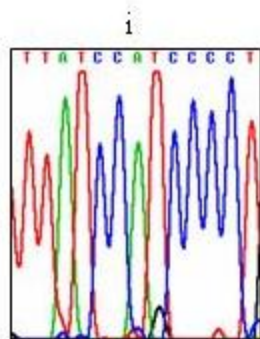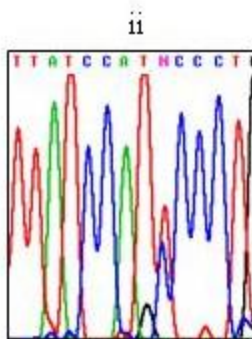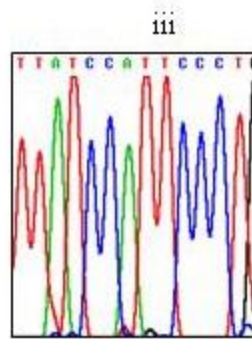

Supplement: 608623fig.pdf [file 608623fig.pdf]
